# Supplementary material
Source: Springer Nature journal article supplement (https://www.springermedizin.de/resource/supplementary/13063_2008_296_MOESM1_ESM.pdf/9618082)
Supplement: MOESM1 [file 9618082]

# EORTC QLQ-C30 Version 3.0.

□ Preoperative

□ 12 months after surgery

|                                        | Scale      | Item range | Version 3.0<br>Item numbers | RS <sup>1)</sup> | Score |
|----------------------------------------|------------|------------|-----------------------------|------------------|-------|
| <b>Global health status/QoL</b>        |            |            |                             | □□□              | □□□   |
| Global health status/QoL <sup>3)</sup> | <b>QL2</b> | 6          | 29, 30                      | □□□              | □□□   |
| <b>Functional scales</b>               |            |            |                             | □□□              | □□□   |
| Physical functioning <sup>2)</sup>     | <b>PF2</b> | 3          | 1, 2, 3, 4, 5               | □□□              | □□□   |
| Role functioning <sup>2)</sup>         | <b>RF2</b> | 3          | 6, 7                        | □□□              | □□□   |
| Emotional functioning <sup>2)</sup>    | <b>EF</b>  | 3          | 21, 22, 23, 24              | □□□              | □□□   |
| Cognitive functioning <sup>2)</sup>    | <b>CF</b>  | 3          | 20, 25                      | □□□              | □□□   |
| Social functioning <sup>2)</sup>       | <b>SF</b>  | 3          | 26, 27                      | □□□              | □□□   |
| <b>Symptoms scales/items</b>           |            |            |                             | □□□              | □□□   |
| Fatigue <sup>3)</sup>                  | <b>FA</b>  | 3          | 10, 12, 18                  | □□□              | □□□   |
| Nausea and vomiting <sup>3)</sup>      | <b>NV</b>  | 3          | 14, 15                      | □□□              | □□□   |
| Pain <sup>3)</sup>                     | <b>PA</b>  | 3          | 9, 19                       | □□□              | □□□   |
| Dyspnea <sup>3)</sup>                  | <b>DY</b>  | 3          | 8                           | □□□              | □□□   |
| Insomnia <sup>3)</sup>                 | <b>SL</b>  | 3          | 11                          | □□□              | □□□   |
| Appetite loss <sup>3)</sup>            | <b>AP</b>  | 3          | 13                          | □□□              | □□□   |
| Constipation <sup>3)</sup>             | <b>CO</b>  | 3          | 16                          | □□□              | □□□   |
| Diarrhea <sup>3)</sup>                 | <b>DI</b>  | 3          | 17                          | □□□              | □□□   |
| Financial difficulties <sup>3)</sup>   | <b>FI</b>  | 3          | 28                          | □□□              | □□□   |

1) RawScore (RS) =  $(I_1 + I_2 + \dots + I_n) / n$

2) Functional scales : Score =  $\{1 - (RS - 1) / \text{Item range}\} \times 100$

3) Symptoms scales, items and Global health status/QoL : Score =  $\{(RS - 1) / \text{Item range}\} \times 100$
